# Supplementary material
Source: ML conference proceedings conference paper supplement (https://proceedings.neurips.cc/paper_files/paper/2017/hash/a5e0ff62be0b08456fc7f1e88812af3d-Abstract.html)
Supplement: Supplementary file [file a5e0ff62be0b08456fc7f1e88812af3d-Supplemental.zip]

---

# Supplementary Material for "Train longer, generalize better: closing the generalization gap in large batch training regime of neural networks"

---

## Appendix

### A Derivation of eq. (6)

Note that we can write the mini-batch gradient as

$$\hat{\mathbf{g}} = \frac{1}{M} \sum_{n=1}^N \mathbf{g}_n s_n \text{ with } s_n \triangleq \begin{cases} 1 & , \text{ if } n \in B \\ 0 & , \text{ if } n \notin B \end{cases}$$

Clearly,  $\hat{\mathbf{g}}$  is an unbiased estimator of  $\mathbf{g}$ , if

$$\mathbb{E} s_n = P(s_n = 1) = \frac{M}{N}.$$

since then

$$\mathbb{E} \hat{\mathbf{g}} = \frac{1}{M} \sum_{n=1}^N \mathbf{g}_n \mathbb{E} s_n = \frac{1}{N} \sum_{n=1}^N \mathbf{g}_n = \mathbf{g}.$$

First, we consider the simpler case of sampling with replacement. In this case it easy to see that different minibatches are uncorrelated, and we have

$$\begin{aligned} \mathbb{E}[s_n s_{n'}] &= P(s_n = 1) \delta_{nn'} + P(s_n = 1, s_{n'} = 1) (1 - \delta_{nn'}) \\ &= \frac{M}{N} \delta_{nn'} + \frac{M^2}{N^2} (1 - \delta_{nn'}) . \end{aligned}$$

and therefore

$$\begin{aligned} \text{cov}(\hat{\mathbf{g}}, \hat{\mathbf{g}}) &= \mathbb{E}[\hat{\mathbf{g}} \hat{\mathbf{g}}^\top] - \mathbb{E} \hat{\mathbf{g}} \mathbb{E} \hat{\mathbf{g}}^\top \\ &= \frac{1}{M^2} \sum_{n=1}^N \sum_{n'=1}^N \mathbb{E}[s_n s_{n'}] \mathbf{g}_n \mathbf{g}_{n'}^\top - \mathbf{g} \mathbf{g}^\top \\ &= \frac{1}{M^2} \sum_{n=1}^N \sum_{n'=1}^N \left[ \frac{M}{N} \delta_{nn'} + \frac{M^2}{N^2} (1 - \delta_{nn'}) \right] \mathbf{g}_n \mathbf{g}_{n'}^\top - \mathbf{g} \mathbf{g}^\top \\ &= \left( \frac{1}{M} - \frac{1}{N} \right) \frac{1}{N} \sum_{n=1}^N \mathbf{g}_n \mathbf{g}_n^\top, \end{aligned}$$

which confirms eq. (6).

Next, we consider the case of sampling without replacement. In this case the selector variables are now different and correlated between different mini-batches (*e.g.*, with indices  $t$  and  $t + k$ ), since we

cannot select previous samples. Thus, these variables  $s_n^t$  and  $s_n^{t+k}$  have the following second-order statistics

$$\begin{aligned}\mathbb{E}[s_n^t s_{n'}^{t+k}] &= P(s_n^t = 1, s_{n'}^{t+k} = 1) \\ &= \frac{M}{N} \delta_{nn'} \delta_{k0} + \frac{M}{N} \frac{M}{N-1} (1 - \delta_{nn'} \delta_{k0}) .\end{aligned}$$

This implies

$$\begin{aligned}\mathbb{E}[\hat{\mathbf{g}}_t \hat{\mathbf{g}}_{t+k}^\top] &- \mathbb{E}\hat{\mathbf{g}}_t \mathbb{E}\hat{\mathbf{g}}_{t+k}^\top \\ &= \mathbb{E}\left[\left(\frac{1}{M} \sum_{n=1}^N s_n^t \mathbf{g}_n\right) \left(\frac{1}{M} \sum_{n'=1}^N s_{n'}^{t+k} \mathbf{g}_{n'}^\top\right)\right] - \mathbf{g} \mathbf{g}^\top \\ &= \frac{1}{M^2} \sum_{n=1}^N \sum_{n'=1}^N \mathbb{E}[s_n^t s_{n'}^{t+k}] \mathbf{g}_n \mathbf{g}_{n'}^\top - \mathbf{g} \mathbf{g}^\top \\ &= \frac{1}{M^2} \sum_{n=1}^N \sum_{n'=1}^N \left[\left(\frac{M}{N} - \frac{M^2}{N^2 - N}\right) \delta_{nn'} \delta_{k0} - \frac{M^2}{N^2 - N}\right] \mathbf{g}_n \mathbf{g}_{n'}^\top - \mathbf{g} \mathbf{g}^\top\end{aligned}$$

so, if  $k = 0$  the covariance is

$$\begin{aligned}\mathbb{E}[\hat{\mathbf{g}}_t \hat{\mathbf{g}}_t^\top] - \mathbb{E}\hat{\mathbf{g}}_t \mathbb{E}\hat{\mathbf{g}}_t^\top &= \left(\frac{1}{M} - \frac{1}{N-1}\right) \frac{1}{N} \sum_{n=1}^N \mathbf{g}_n \mathbf{g}_n^\top + \frac{1}{N-1} \mathbf{g} \mathbf{g}^\top \\ &\stackrel{M \ll N}{\approx} \frac{1}{M} \left(\frac{1}{N} \sum_{n=1}^N \mathbf{g}_n \mathbf{g}_n^\top\right)\end{aligned}$$

while the covariance between different minibatches ( $k \neq 0$ ) is much smaller for  $M \ll N$

$$\mathbb{E}[\hat{\mathbf{g}}_t \hat{\mathbf{g}}_{t+k}^\top] - \mathbb{E}\hat{\mathbf{g}}_t \mathbb{E}\hat{\mathbf{g}}_{t+k}^\top = \frac{1}{N-1} \mathbf{g} \mathbf{g}^\top$$

this again confirms eq. (6).

## B Estimating $\alpha$ from random potential

The logarithmic increase in weight distance (Figure 2 in the paper) matches a “random walk on a random potential” model with  $\alpha = 2$ . In such a model the loss auto-covariance asymptotically increases with the square of the weight distance, or, equivalently (Marinari et al., 1983), the standard deviation of the loss difference asymptotically increases linearly with the weight distance

$$\text{std} \triangleq \sqrt{\mathbb{E}(L(\mathbf{w}) - L(\mathbf{w}_0))^2} \sim \|\mathbf{w} - \mathbf{w}_0\| . \quad (1)$$

In this section we examine this behavior: in Figure we indeed find such a linear behavior, confirming the prediction of our model with  $\alpha = 2$ .

To obtain the relevant statistics to plot eq. 1 we conducted the following experiment on Resnet44 model (He et al., 2016). We initialized the model weights,  $\mathbf{w}_0$ , according to Glorot & Bengio (2010), and repeated the following steps a 1000 times, given some parameter  $c$ :

- Sample a random direction  $\mathbf{v}$  with norm one.
- Sample a scalar  $z$  uniformly in some range  $[0, c]$ .
- Choose  $\mathbf{w} = \mathbf{w}_0 + z\mathbf{v}$ .
- Save  $\|\mathbf{w} - \mathbf{w}_0\|$  and  $L(\mathbf{w})$ .

We have set the parameter  $c$  so that the maximum weight distance from initialization  $\|\mathbf{w} - \mathbf{w}_0\|$  is equal to the same maximal distance in Figure 2 in the paper, *i.e.*,  $c \approx 10$ .

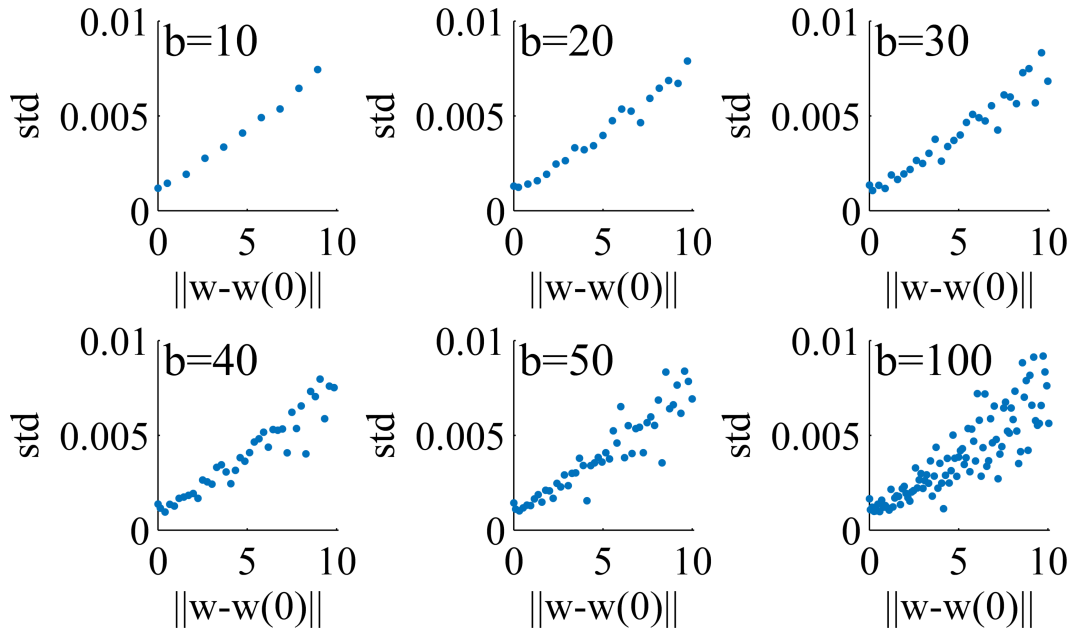

Figure 1: **The standard deviation of the loss shows linear dependence on weight distance (eq. 1) as predicted by the "random walk on a random potential" model with  $\alpha = 2$  we found in the main paper.** To approximate the ensemble average in eq. 1 we divided the x-axis to  $b$  bins and calculated the empiric average in each bin. Each panel shows the resulting graph for a different value of  $b$ .

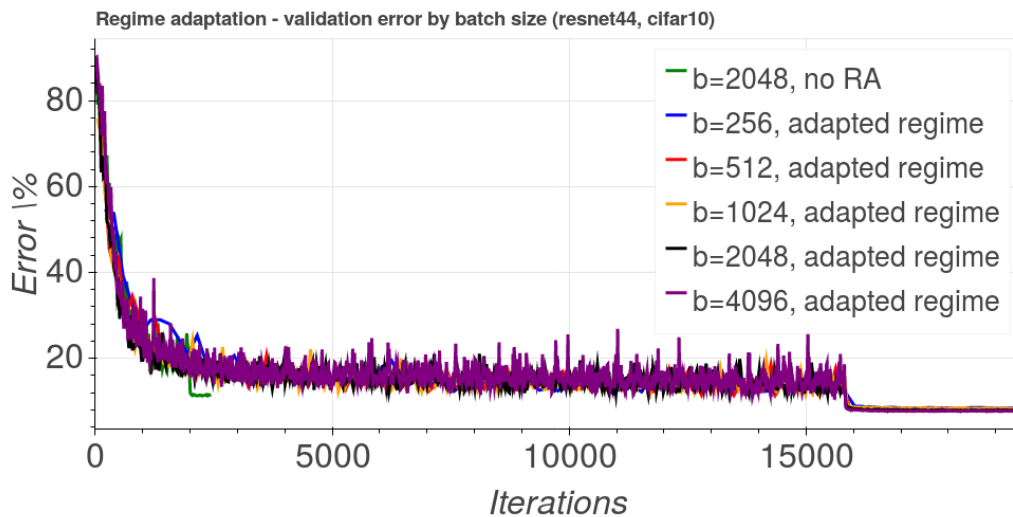

Figure 2: Comparing regime adapted large batch training vs. a 2048 batch with no adaptation.

## References

- Glorot, X. and Bengio, Y. Understanding the difficulty of training deep feedforward neural networks. In *Aistats*, volume 9, pp. 249–256, 2010.
- He, K., Zhang, X., Ren, S., and Sun, J. Deep residual learning for image recognition. In *Proceedings of the IEEE Conference on Computer Vision and Pattern Recognition*, pp. 770–778, 2016.
- Marinari, E., Parisi, G., Ruelle, D., and Windey, P. Random Walk in a Random Environment and If Noise. *Physical Review Letters*, 50(1):1223–1225, 1983.

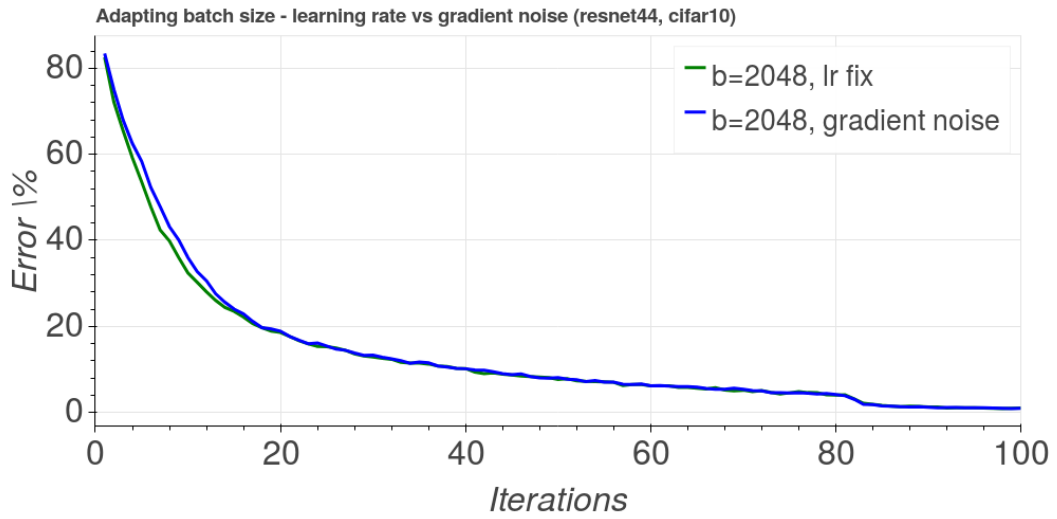

Figure 3: Comparing a learning scale fix for a 2048 batch, to a multiplicative noise to the gradient of the same scale

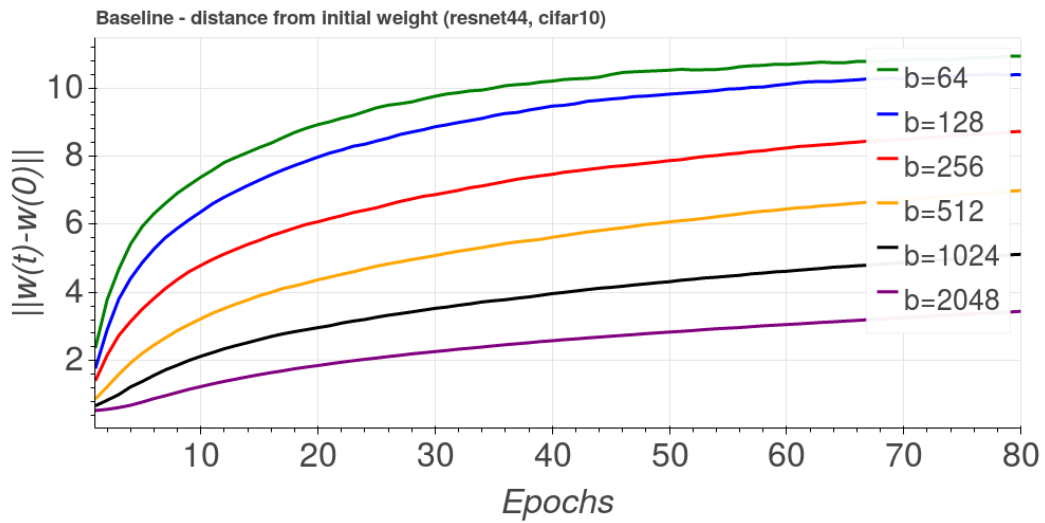

Figure 4: Comparing  $L_2$  distance from initial weight for different batch sizes
